# Supplementary material for: Use of tocilizumab and sarilumab alone or in combination with corticosteroids for covid-19: systematic review and network meta-analysis
Source: PubMed Central journal article supplement (PMC9978750; doi:10.1136/bmjmed-2021-000036), 2022-02-28
Supplement: bmjmed-2021-000036supp001.pdf [file bmjmed-2021-000036supp001.pdf]

| Ref ID       | 1st Author                 | Intervention name | Subgroup    | Dichotomous outcomes                                                                    |                       |            | Comments |                  |
|--------------|----------------------------|-------------------|-------------|-----------------------------------------------------------------------------------------|-----------------------|------------|----------|------------------|
|              |                            |                   |             | Outcome                                                                                 | Follow-up time (days) | N analyzed |          | Number of events |
| 5743, 2967:  | Corral-Gudino              | thylprednisol     | NA          | 1=Mortality [closest to 90 days]                                                        | 28                    | 35         | 7        | NA               |
| 5743, 2967:  | Corral-Gudino              | standard care     | NA          | 2=Mechanical ventilation (includes both invasive and non-invasive) [closest to 90 days] | 28                    | 29         | 5        | NA               |
| 9, 7002, 33  | Horby_1                    | examethasor       | NA          | 3=Admission to hospital [within 28 days]                                                | 28                    | 2104       | 482      | NA               |
| 9, 7002, 33  | Horby_1                    | standard care     | NA          | 4=Adverse effects leading to discontinuation [within 28 days]                           | 28                    | 4321       | 1110     | NA               |
| 12062        | Dequin                     | hydrocortison     | NA          | 5=Viral clearance [closest to 7 days +/- 3 days]                                        | 21                    | 75         | 11       | NA               |
| 12062        | Dequin                     | placebo           | NA          | 6=Venous thromboembolism [only for anticoagulants]                                      | 21                    | 73         | 20       | NA               |
| 12141        | Tomazini                   | examethasor       | NA          | 7=Clinically important bleeding [only for                                               | 28                    | 151        | 85       | NA               |
| 12141        | Tomazini                   | standard care     | NA          |                                                                                         | 28                    | 148        | 91       | NA               |
| 12146        | Angus                      | ortisone (fixe    | NA          |                                                                                         | NR                    | 137        | 41       | NA               |
| 12146        | Angus                      | sone (shock-c     | NA          |                                                                                         | NR                    | 141        | 37       | NA               |
| 12146        | Angus                      | standard care     | NA          |                                                                                         | NR                    | 101        | 33       | NA               |
| r Patients \ | Sterne                     | examethasor       | NA          |                                                                                         | 28                    | 7          | 2        | NA               |
| r Patients \ | Sterne                     | standard care     | NA          |                                                                                         | 28                    | 12         | 2        | NA               |
|              |                            | hydrocortis       |             |                                                                                         |                       |            |          |                  |
| D-19 and S   | Sterne                     | one               | NA          |                                                                                         | 28                    | 15         | 6        | NA               |
| D-19 and S   | Sterne                     | placebo           | NA          |                                                                                         | 28                    | 14         | 2        | NA               |
| Ill Patients | Sterne                     | thylprednisol     | NA          |                                                                                         | 30                    | 24         | 13       | NA               |
| Ill Patients | Sterne                     | standard care     | NA          |                                                                                         | 30                    | 23         | 13       | NA               |
| 13208        | Edalatifard                | thylprednisol     | NA          |                                                                                         | NR                    | 34         | 2        | NA               |
| 13208        | Edalatifard                | standard care     | NA          |                                                                                         | NR                    | 28         | 12       | NA               |
| 2            | Farahani                   | dnisolone, pr     | NA          |                                                                                         | NR                    | 14         | 0        | NA               |
| 2            | Farahani                   | standard care     | NA          |                                                                                         | NR                    | 15         | NR       | NA               |
| 27640        | Tang_2                     | thylprednisol     | NA          |                                                                                         | NR                    | 43         | 0        | NA               |
| 27640        | Tang_2                     | standard care     | NA          |                                                                                         | NR                    | 43         | 1        | NA               |
| 31583        | Jamaati                    | examethasor       | NA          |                                                                                         | 28                    | 25         | 16       | NA               |
| 31583        | Jamaati                    | standard care     | NA          |                                                                                         | 28                    | 25         | 15       | NA               |
| 10699        | Jeronimo                   | thylprednisol     | NA          |                                                                                         | 28                    | 209        | 79       | NA               |
| 10699        | Jeronimo                   | placebo           | NA          |                                                                                         | 28                    | 207        | 80       | NA               |
| osias, 3330  | COVACTA_NCT04320615        | tocilizumab       | Steroids    |                                                                                         | 90                    | 56         | 16       | NA               |
| osias, 3330  | COVACTA_NCT04320615        | placebo           | Steroids    |                                                                                         | 90                    | 41         | 14       | NA               |
| osias, 3330  | COVACTA_NCT04320615        | tocilizumab       | No steroids |                                                                                         | 90                    | 238        | 56       | NA               |
| osias, 3330  | COVACTA_NCT04320615        | placebo           | No steroids |                                                                                         | 90                    | 103        | 22       | NA               |
| 30368        | RECOVERY_NCT04381936       | tocilizumab       | Steroids    |                                                                                         | 28                    | 1664       | 482      | NA               |
| 30368        | RECOVERY_NCT04381936       | standard care     | Steroids    |                                                                                         | 28                    | 1721       | 600      | NA               |
| 30368        | RECOVERY_NCT04381936       | tocilizumab       | No steroids |                                                                                         | 28                    | 357        | 139      | NA               |
| 30368        | RECOVERY_NCT04381936       | standard care     | No steroids |                                                                                         | 28                    | 367        | 127      | NA               |
| :CTS_NCT0    | ARCHITECTS_NCT04412772     | tocilizumab       | Steroids    |                                                                                         | 90                    | 9          | 0        | NA               |
| :CTS_NCT0    | ARCHITECTS_NCT04412772     | placebo           | Steroids    |                                                                                         | 90                    | 11         | 2        | NA               |
| :CTS_NCT0    | ARCHITECTS_NCT04412772     | tocilizumab       | No steroids |                                                                                         | 90                    | 1          | 0        | NA               |
| :CTS_NCT0    | ARCHITECTS_NCT04412772     | placebo           | No steroids |                                                                                         | 90                    | 0          | 0        | NA               |
| 16283        | BACC Bay_NCT04356937       | tocilizumab       | Steroids    |                                                                                         | 28                    | 3          | 0        | NA               |
| 16283        | BACC Bay_NCT04356937       | placebo           | Steroids    |                                                                                         | 28                    | 1          | 0        | NA               |
| 16283        | BACC Bay_NCT04356937       | tocilizumab       | No steroids |                                                                                         | 28                    | 158        | 9        | NA               |
| 16283        | BACC Bay_NCT04356937       | placebo           | No steroids |                                                                                         | 28                    | 81         | 4        | NA               |
| 16128        | ORIMUNO-TOCI-1_NCT043318C  | tocilizumab       | Steroids    |                                                                                         | 90                    | 10         | 1        | NA               |
| 16128        | ORIMUNO-TOCI-1_NCT043318C  | standard care     | Steroids    |                                                                                         | 90                    | 12         | 4        | NA               |
| 16128        | ORIMUNO-TOCI-1_NCT043318C  | tocilizumab       | No steroids |                                                                                         | 90                    | 53         | 6        | NA               |
| 16128        | ORIMUNO-TOCI-1_NCT043318C  | standard care     | No steroids |                                                                                         | 90                    | 55         | 7        | NA               |
| 16127        | ORIMUNO-TOCI-ICU_NCT043318 | tocilizumab       | Steroids    |                                                                                         | 90                    | 8          | 4        | NA               |
| 16127        | ORIMUNO-TOCI-ICU_NCT043318 | standard care     | Steroids    |                                                                                         | 90                    | 4          | 2        | NA               |
| 16127        | ORIMUNO-TOCI-ICU_NCT043318 | tocilizumab       | No steroids |                                                                                         | 90                    | 41         | 8        | NA               |
| 16127        | ORIMUNO-TOCI-ICU_NCT043318 | standard care     | No steroids |                                                                                         | 90                    | 39         | 11       | NA               |
| ID_NCT04     | COV-AID_NCT04330638        | tocilizumab       | Steroids    |                                                                                         | 90                    | 48         | 7        | NA               |
| ID_NCT04     | COV-AID_NCT04330638        | standard care     | Steroids    |                                                                                         | 90                    | 42         | 3        | NA               |
| ID_NCT04     | COV-AID_NCT04330638        | tocilizumab       | No steroids |                                                                                         | 90                    | 33         | 3        | NA               |
| ID_NCT04     | COV-AID_NCT04330638        | standard care     | No steroids |                                                                                         | 90                    | 30         | 6        | NA               |
| :2-SSA_NCT   | COVIDOSE2-SSA_NCT04479358  | tocilizumab       | Steroids    |                                                                                         | 28                    | 6          | 0        | NA               |
| :2-SSA_NCT   | COVIDOSE2-SSA_NCT04479358  | standard care     | Steroids    |                                                                                         | 28                    | 2          | 1        | NA               |
| :2-SSA_NCT   | COVIDOSE2-SSA_NCT04479358  | tocilizumab       | No steroids |                                                                                         | 28                    | 13         | 0        | NA               |

|                                        |               |             |   |    |     |     |    |
|----------------------------------------|---------------|-------------|---|----|-----|-----|----|
| 2-SSA_NCT04479358                      | standard care | No steroids | 1 | 28 | 6   | 1   | NA |
| 6340, 2364 EMPACTA_NCT04372186         | tocilizumab   | Steroids    | 1 | 90 | 200 | 27  | NA |
| 6340, 2364 EMPACTA_NCT04372186         | placebo       | Steroids    | 1 | 90 | 112 | 15  | NA |
| 6340, 2364 EMPACTA_NCT04372186         | tocilizumab   | No steroids | 1 | 90 | 49  | 2   | NA |
| 6340, 2364 EMPACTA_NCT04372186         | placebo       | No steroids | 1 | 90 | 16  | 0   | NA |
| -0224_NCT HMO-020-0224_NCT04377750     | tocilizumab   | Steroids    | 1 | 90 | 31  | 16  | NA |
| -0224_NCT HMO-020-0224_NCT04377750     | placebo       | Steroids    | 1 | 90 | 15  | 9   | NA |
| -0224_NCT HMO-020-0224_NCT04377750     | tocilizumab   | No steroids | 1 | 90 | 6   | 2   | NA |
| -0224_NCT HMO-020-0224_NCT04377750     | placebo       | No steroids | 1 | 90 | 2   | 1   | NA |
| 1, Gordon_1P-CAP_1_NCT02735707_tociliz | tocilizumab   | Steroids    | 1 | 90 | 214 | 63  | NA |
| 1, Gordon_1P-CAP_1_NCT02735707_tociliz | standard care | Steroids    | 1 | 90 | 217 | 80  | NA |
| 1, Gordon_1P-CAP_1_NCT02735707_sarilu  | sarilumab     | Steroids    | 1 | 90 | 44  | 8   | NA |
| 1, Gordon_1P-CAP_1_NCT02735707_sarilu  | standard care | Steroids    | 1 | 90 | 52  | 13  | NA |
| 1, Gordon_1P-CAP_1_NCT02735707_tociliz | tocilizumab   | No steroids | 1 | 90 | 127 | 33  | NA |
| 1, Gordon_1P-CAP_1_NCT02735707_tociliz | standard care | No steroids | 1 | 90 | 129 | 44  | NA |
| 1, Gordon_1P-CAP_1_NCT02735707_sarilu  | sarilumab     | No steroids | 1 | 90 | 4   | 2   | NA |
| 1, Gordon_1P-CAP_1_NCT02735707_sarilu  | standard care | No steroids | 1 | 90 | 11  | 5   | NA |
| Gordon_2 REMAP-CAP_2_NCT02735707       | tocilizumab   | Steroids    | 1 | NR | 589 | 215 | NA |
| Gordon_2 REMAP-CAP_2_NCT02735707       | sarilumab     | Steroids    | 1 | NR | 431 | 146 | NA |
| CTA_NCT04 REMDACTA_NCT04409262         | tocilizumab   | Steroids    | 1 | 28 | 358 | 69  | NA |
| CTA_NCT04 REMDACTA_NCT04409262         | placebo       | Steroids    | 1 | 28 | 181 | 39  | NA |
| CTA_NCT04 REMDACTA_NCT04409262         | tocilizumab   | No steroids | 1 | 28 | 72  | 9   | NA |
| CTA_NCT04 REMDACTA_NCT04409262         | placebo       | No steroids | 1 | 28 | 29  | 2   | NA |
| 27470 TOCIBRAS_NCT04403685             | tocilizumab   | Steroids    | 1 | 90 | 31  | 9   | NA |
| 27470 TOCIBRAS_NCT04403685             | standard care | Steroids    | 1 | 90 | 34  | 5   | NA |
| 27470 TOCIBRAS_NCT04403685             | tocilizumab   | No steroids | 1 | 90 | 34  | 8   | NA |
| 27470 TOCIBRAS_NCT04403685             | standard care | No steroids | 1 | 90 | 30  | 2   | NA |
| -SARI-1_NCORIMUNO-SARI-1_NCT0432407    | sarilumab     | Steroids    | 1 | 90 | 4   | 2   | NA |
| -SARI-1_NCORIMUNO-SARI-1_NCT0432407    | standard care | Steroids    | 1 | 90 | 3   | 0   | NA |
| -SARI-1_NCORIMUNO-SARI-1_NCT0432407    | sarilumab     | No steroids | 1 | 90 | 72  | 14  | NA |
| -SARI-1_NCORIMUNO-SARI-1_NCT0432407    | standard care | No steroids | 1 | 90 | 65  | 10  | NA |
| SARI-ICU_NRIMUNO-SARI-ICU_NCT043240    | sarilumab     | Steroids    | 1 | 90 | 0   | 0   | NA |
| SARI-ICU_NRIMUNO-SARI-ICU_NCT043240    | standard care | Steroids    | 1 | 90 | 2   | 0   | NA |
| SARI-ICU_NRIMUNO-SARI-ICU_NCT043240    | sarilumab     | No steroids | 1 | 90 | 48  | 14  | NA |
| SARI-ICU_NRIMUNO-SARI-ICU_NCT043240    | standard care | No steroids | 1 | 90 | 31  | 13  | NA |
| VID_NCT04 SARCOVID_NCT04357808         | sarilumab     | Steroids    | 1 | 90 | 17  | 1   | NA |
| VID_NCT04 SARCOVID_NCT04357808         | standard care | Steroids    | 1 | 90 | 8   | 0   | NA |
| VID_NCT04 SARCOVID_NCT04357808         | sarilumab     | No steroids | 1 | 90 | 3   | 1   | NA |
| VID_NCT04 SARCOVID_NCT04357808         | standard care | No steroids | 1 | 90 | 2   | 0   | NA |
| JdraCT2020(ARICOR_EudraCT2020-001531-2 | sarilumab     | Steroids    | 1 | 28 | 66  | 2   | NA |
| JdraCT2020(ARICOR_EudraCT2020-001531-2 | standard care | Steroids    | 1 | 28 | 34  | 3   | NA |
| JdraCT2020(ARICOR_EudraCT2020-001531-2 | sarilumab     | No steroids | 1 | 28 | 10  | 1   | NA |
| JdraCT2020(ARICOR_EudraCT2020-001531-2 | standard care | No steroids | 1 | 28 | 5   | 1   | NA |
| draCT2020(ARTRE_EudraCT2020-002037-1   | sarilumab     | Steroids    | 1 | 28 | 70  | 2   | NA |
| draCT2020(ARTRE_EudraCT2020-002037-1   | standard care | Steroids    | 1 | 28 | 70  | 1   | NA |
| draCT2020(ARTRE_EudraCT2020-002037-1   | sarilumab     | No steroids | 1 | 28 | 0   | 0   | NA |
| draCT2020(ARTRE_EudraCT2020-002037-1   | standard care | No steroids | 1 | 28 | 0   | 0   | NA |
| OVIDSTORI COVIDSTORM                   | tocilizumab   | Steroids    | 1 | 90 | 13  | 1   | NA |
| OVIDSTORI COVIDSTORM                   | standard care | Steroids    | 1 | 90 | 17  | 1   | NA |
| OVIDSTORI COVIDSTORM                   | tocilizumab   | No steroids | 1 | 90 | 0   | 0   | NA |
| OVIDSTORI COVIDSTORM                   | standard care | No steroids | 1 | 90 | 9   | 0   | NA |
| ImmCoVA ImmCoVA                        | tocilizumab   | Steroids    | 1 | 28 | 21  | 2   | NA |
| ImmCoVA ImmCoVA                        | standard care | Steroids    | 1 | 28 | 26  | 2   | NA |
| ImmCoVA ImmCoVA                        | tocilizumab   | No steroids | 1 | 28 | 1   | 0   | NA |
| ImmCoVA ImmCoVA                        | standard care | No steroids | 1 | 28 | 1   | 0   | NA |
| Rutgers PreToVid_Trial NL8504          | tocilizumab   | Steroids    | 1 | 28 | 159 | 20  | NA |
| Rutgers PreToVid_Trial NL8504          | standard care | Steroids    | 1 | 28 | 167 | 32  | NA |
| Rutgers PreToVid_Trial NL8504          | tocilizumab   | No steroids | 1 | 28 | 11  | 1   | NA |
| Rutgers PreToVid_Trial NL8504          | standard care | No steroids | 1 | 28 | 11  | 2   | NA |
| 41237 Rashad                           | tocilizumab   | NA          | 1 | 14 | 74  | 60  | NA |
| 41237 Rashad                           | examethason   | NA          | 1 | 14 | 75  | 45  | NA |
| /apalasinge REGENERON-P2_NCT04315298   | sarilumab     | Steroids    | 1 | 90 | 62  | 28  | NA |
| /apalasinge REGENERON-P2_NCT04315298   | standard care | Steroids    | 1 | 90 | 14  | 6   | NA |
| /apalasinge REGENERON-P2_NCT04315298   | sarilumab     | No steroids | 1 | 90 | 305 | 81  | NA |
| /apalasinge REGENERON-P2_NCT04315298   | standard care | No steroids | 1 | 90 | 76  | 18  | NA |
| /apalasinge REGENERON-P3_NCT04315298   | sarilumab     | Steroids    | 1 | 90 | 345 | 99  | NA |
| /apalasinge REGENERON-P3_NCT04315298   | standard care | Steroids    | 1 | 90 | 99  | 34  | NA |
| /apalasinge REGENERON-P3_NCT04315298   | sarilumab     | No steroids | 1 | 90 | 699 | 198 | NA |

|                                      |               |               |             |    |     |    |    |    |
|--------------------------------------|---------------|---------------|-------------|----|-----|----|----|----|
| rapalasing: REGENERON-P3_NCT04315299 | standard care | No steroids   | 1           | 90 | 187 | 50 | NA |    |
| COVITOX                              | COVITOX       | tocilizumab   | Steroids    | 1  | 90  | 6  | 0  | NA |
| COVITOX                              | COVITOX       | standard care | Steroids    | 1  | 90  | 6  | 0  | NA |
| COVITOX                              | COVITOX       | tocilizumab   | No steroids | 1  | 90  | 4  | 0  | NA |
| COVITOX                              | COVITOX       | standard care | No steroids | 1  | 90  | 3  | 0  | NA |
