# Supplementary material for: Use of tocilizumab and sarilumab alone or in combination with corticosteroids for covid-19: systematic review and network meta-analysis
Source: PubMed Central journal article supplement (PMC9978750; doi:10.1136/bmjmed-2021-000036), 2022-02-28
Supplement: bmjmed-2021-000036supp002.pdf [file bmjmed-2021-000036supp002.pdf]

| Comparison            |                       | Direct estimate   |                |                | Indirect estimate |                |                | Network estimate  |                |                |                               |                |                | Reasons      |                           |                    |
|-----------------------|-----------------------|-------------------|----------------|----------------|-------------------|----------------|----------------|-------------------|----------------|----------------|-------------------------------|----------------|----------------|--------------|---------------------------|--------------------|
| Treatment 1           | Treatment 2           | Relative estimate |                |                | Relative estimate |                |                | Relative estimate |                |                | Absolute estimate (per 1,000) |                |                | Final rating | Higher certainty estimate |                    |
|                       |                       | Point estimate    | CI lower limit | CI upper limit | Point estimate    | CI lower limit | CI upper limit | Point estimate    | CI lower limit | CI upper limit | Point estimate                | CI lower limit | CI upper limit |              |                           |                    |
| sarilumab             | sarilumab, steroids   | NA                | NA             | NA             | 1.75              | 1.21           | 2.56           | 1.75              | 1.21           | 2.56           | 82.6                          | 31.26          | 125            | LOW          | NMA                       | RoB, Imprecision   |
| sarilumab             | standard care/placebo | 1.05              | 0.68           | 1.59           | NA                | NA             | NA             | 1.07              | 0.81           | 1.4            | 10.6                          | -38.37         | 55.17          | LOW          | NMA                       | RoB, Imprecision   |
| sarilumab             | steroids              | NA                | NA             | NA             | 1.28              | 0.95           | 1.72           | 1.28              | 0.95           | 1.72           | 39.87                         | -7.76          | 82.29          | LOW          | NMA                       | RoB, Imprecision   |
| sarilumab             | tocilizumab           | NA                | NA             | NA             | 0.95              | 0.68           | 1.35           | 0.95              | 0.68           | 1.35           | -9.13                         | -74.66         | 49.13          | VERY LOW     | NMA                       | RoB, Imprecisionx2 |
| sarilumab             | tocilizumab, steroids | NA                | NA             | NA             | 1.63              | 1.2            | 2.25           | 1.63              | 1.2            | 2.25           | 74.41                         | 29.82          | 112.66         | LOW          | NMA                       | RoB, Imprecision   |
| sarilumab, steroids   | standard care/placebo | NA                | NA             | NA             | 0.61              | 0.47           | 0.79           | 0.61              | 0.47           | 0.79           | -72                           | -106.11        | -37.34         | MODERATE     | NMA                       | RoB                |
| sarilumab, steroids   | steroids              | 0.82              | 0.49           | 1.41           | 0.69              | 0.52           | 0.92           | 0.73              | 0.58           | 0.92           | -42.73                        | -72.61         | -12            | LOW          | NMA                       | RoB, Imprecision   |
| sarilumab, steroids   | tocilizumab           | NA                | NA             | NA             | 0.54              | 0.39           | 0.76           | 0.54              | 0.39           | 0.76           | -91.73                        | -144.09        | -42.48         | MODERATE     | NMA                       | RoB                |
| tocilizumab, steroids | sarilumab, steroids   | 1.12              | 0.34           | 3.7            | 0.95              | 0.63           | 1.42           | 1.07              | 0.86           | 1.34           | 8.19                          | -20.49         | 34.96          | LOW          | NMA                       | RoB, Imprecision   |
| steroids              | standard care/placebo | 0.84              | 0.64           | 1.07           | 0.36              | 0.16           | 0.77           | 0.84              | 0.75           | 0.93           | -29.27                        | -46.74         | -12.24         | MODERATE     | NMA                       | RoB                |
| tocilizumab           | standard care/placebo | 0.98              | 0.7            | 1.36           | 2.47              | 1.17           | 5.4            | 1.12              | 0.91           | 1.38           | 19.73                         | -15.78         | 58.52          | LOW          | NMA                       | RoB, Imprecision   |
| standard care/placebo | tocilizumab, steroids | NA                | NA             | NA             | 1.54              | 1.31           | 1.79           | 1.54              | 1.31           | 1.79           | 63.81                         | 40.66          | 88.06          | MODERATE     | NMA                       | RoB                |
| tocilizumab           | steroids              | 2.86              | 0.75           | 10.95          | 1.23              | 0.97           | 1.57           | 1.34              | 1.07           | 1.68           | 49                            | 10.17          | 91.51          | MODERATE     | NMA                       | RoB                |
| tocilizumab, steroids | steroids              | 0.8               | 0.64           | 1.01           | 0.91              | 0.57           | 1.46           | 0.79              | 0.7            | 0.88           | -34.54                        | -51.8          | -18.23         | MODERATE     | NMA                       | RoB                |
| tocilizumab           | tocilizumab, steroids | NA                | NA             | NA             | 1.72              | 1.32           | 2.23           | 1.72              | 1.32           | 2.23           | 83.54                         | 41.39          | 129.99         | MODERATE     | NMA                       | RoB                |
