# Supplementary material for: Use of tocilizumab and sarilumab alone or in combination with corticosteroids for covid-19: systematic review and network meta-analysis
Source: PubMed Central journal article supplement (PMC9978750; doi:10.1136/bmjmed-2021-000036), 2022-02-28
Supplement: bmjmed-2021-000036supp003.pdf [file bmjmed-2021-000036supp003.pdf]

| Treatment 1                  | Treatment 2                | NMA estimate, odds ratio |             |             | NMA estimate, risk difference |        |       | Indirect estimate, odds ratio |      |      | Direct estimate, odds ratio |      |       |
|------------------------------|----------------------------|--------------------------|-------------|-------------|-------------------------------|--------|-------|-------------------------------|------|------|-----------------------------|------|-------|
|                              |                            | OR                       | LCL         | UCL         | RD                            | LCL    | UCL   | OR                            | LCL  | UCL  | OR                          | LCL  | UCL   |
| sarilumab                    | sarilumab, steroids        | 1.75                     | 1.07        | 2.92        | 82.4                          | 12.1   | 136.9 |                               |      |      |                             |      |       |
| sarilumab                    | standard care/placebo      | 1.06                     | 0.76        | 1.49        | 9.1                           | -52.1  | 62.6  |                               |      |      | 1.05                        | 0.68 | 1.59  |
| sarilumab                    | steroids                   | 1.34                     | 0.92        | 2.01        | 46.7                          | -14.6  | 100.4 |                               |      |      |                             |      |       |
| <b>sarilumab</b>             | <b>tocilizumab</b>         | <b>0.97</b>              | <b>0.64</b> | <b>1.48</b> | -8.2                          | -88.4  | 61.3  |                               |      |      |                             |      |       |
| sarilumab                    | tocilizumab, steroids      | 1.67                     | 1.09        | 2.59        | 76.2                          | 15.0   | 126.7 |                               |      |      |                             |      |       |
| sarilumab, steroids          | standard care/placebo      | 0.61                     | 0.41        | 0.87        | -73.3                         | -121.2 | -22.5 |                               |      |      |                             |      |       |
| <b>sarilumab, steroids</b>   | <b>steroids</b>            | <b>0.76</b>              | <b>0.56</b> | <b>1.06</b> | -35.7                         | -74.2  | 8.1   | 0.71                          | 0.44 | 1.15 | 0.82                        | 0.49 | 1.41  |
| sarilumab, steroids          | tocilizumab                | 0.55                     | 0.36        | 0.85        | -90.6                         | -158.0 | -26.4 |                               |      |      |                             |      |       |
| <b>tocilizumab, steroids</b> | <b>sarilumab, steroids</b> | <b>1.05</b>              | <b>0.77</b> | <b>1.43</b> | 6.2                           | -36.0  | 43.4  | 0.96                          | 0.59 | 1.57 | 1.12                        | 0.34 | 3.70  |
| steroids                     | standard care/placebo      | 0.79                     | 0.64        | 0.95        | -37.5                         | -70.3  | -8.2  | 0.35                          | 0.15 | 0.80 | 0.84                        | 0.64 | 1.07  |
| tocilizumab                  | standard care/placebo      | 1.09                     | 0.85        | 1.40        | 17.3                          | -25.7  | 65.5  | 2.42                          | 1.07 | 5.59 | 0.98                        | 0.70 | 1.36  |
| standard care/placebo        | tocilizumab, steroids      | 1.57                     | 1.20        | 2.08        | 67.1                          | 29.0   | 106.9 |                               |      |      |                             |      |       |
| tocilizumab                  | steroids                   | 1.39                     | 1.03        | 1.90        | 54.9                          | 5.9    | 111.4 | 1.23                          | 0.89 | 1.70 | 2.86                        | 0.75 | 10.95 |
| <b>tocilizumab, steroids</b> | <b>steroids</b>            | <b>0.80</b>              | <b>0.67</b> | <b>0.99</b> | -29.6                         | -55.2  | -2.2  | 0.92                          | 0.50 | 1.74 | 0.80                        | 0.64 | 1.01  |
| tocilizumab                  | tocilizumab, steroids      | 1.72                     | 1.21        | 2.46        | 84.4                          | 29.5   | 146.1 |                               |      |      |                             |      |       |

OR, odds ratio; LCL, 95% lower credible limit; UCL, 95% upper credible limit
